# Supplementary material for: Facile synthesis of raspberry-like aniline oligomers with excellent adsorption–desorption properties
Source: Royal Society of Chemistry journal article supplement (doi:10.1039/c4nj00544a), 2014-01-01
Supplement: c4nj00544a1.pdf [file c4nj00544a1.pdf]

## Supporting Information

### Facile synthesis of raspberry-like aniline oligomers with excellent adsorption/desorption properties

*Lei Huang,<sup>a</sup> Xiaodan Yu,<sup>a</sup> Li Gao,<sup>a</sup> Lin Chen,<sup>a</sup> Jiatong Wei<sup>b</sup> and Shuangxi Xing<sup>\*a</sup>*

*<sup>a</sup> Faculty of Chemistry, Northeast Normal University, 5268 Renmin Street, Changchun, P.R.*

*China 130024 Tel: (+86) 85099657; E-mail: xingsx737@nenu.edu.cn*

*<sup>b</sup> State Key Laboratory on Integrated Optoelectronics, College of Electronic Science and*

*Engineering, Jilin University, 2699 Qianjin Street, Changchun, P. R. China 130012*

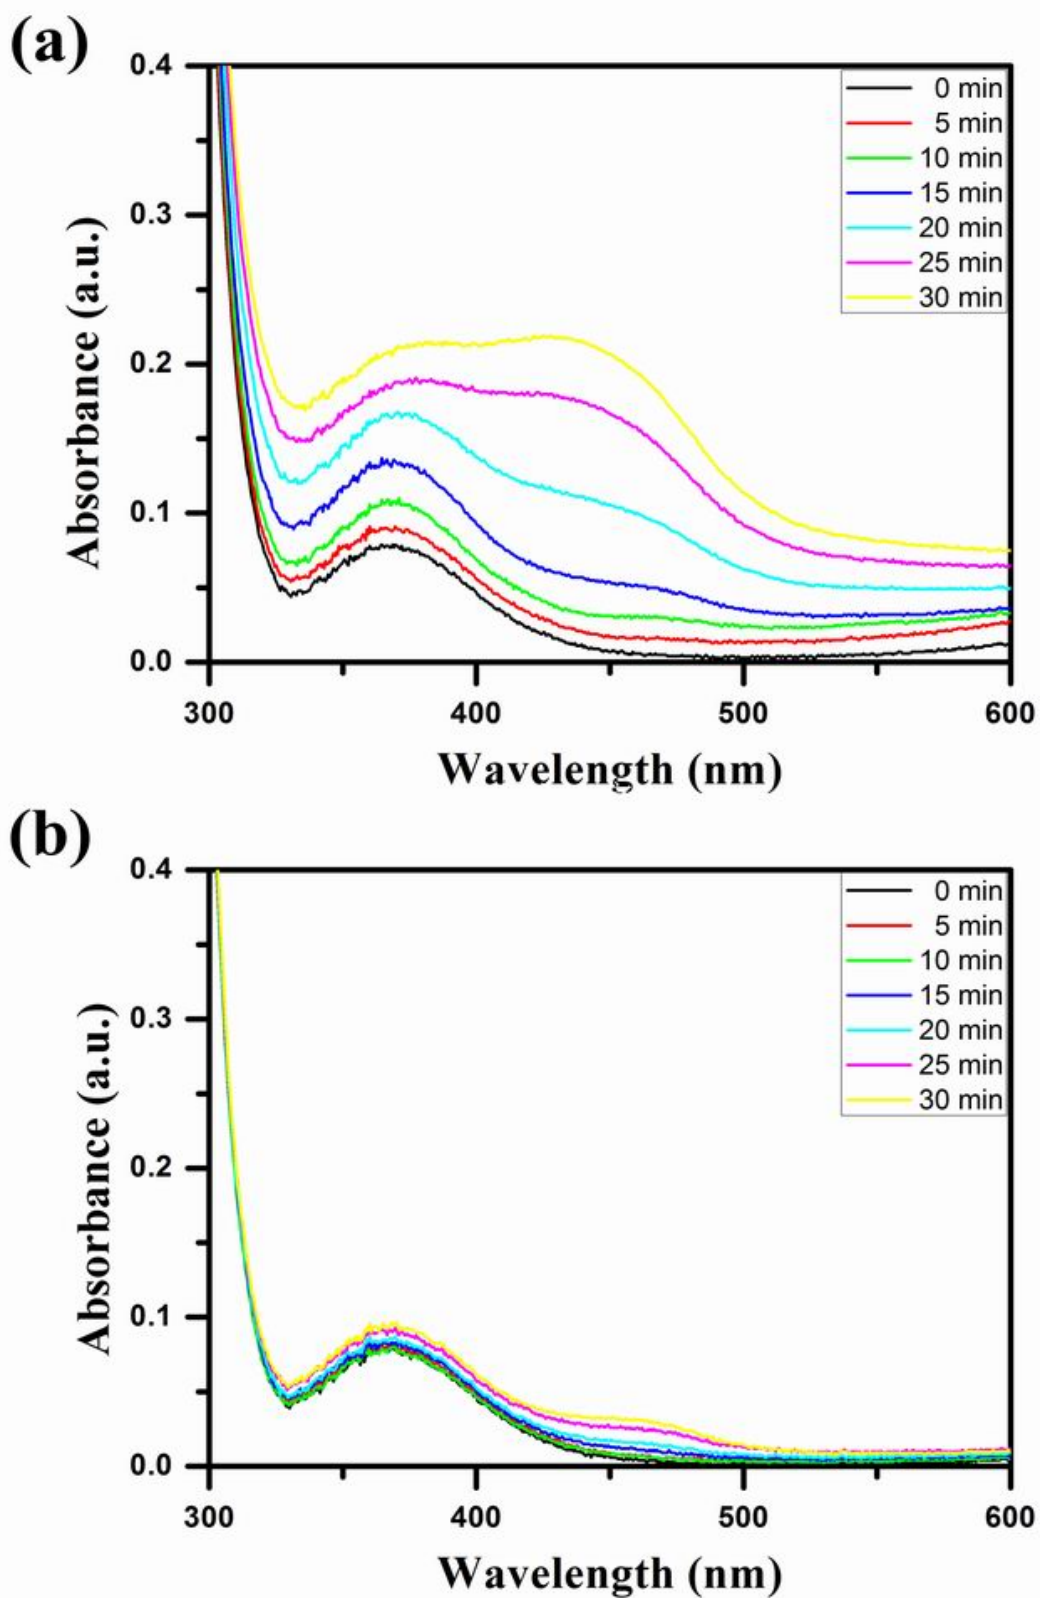

**Figure S1.** UV-Vis spectra of the synthetic mixture for aniline oligomers at different intervals in the presence (a) and absence (b) of *p*-phenylenediamin.

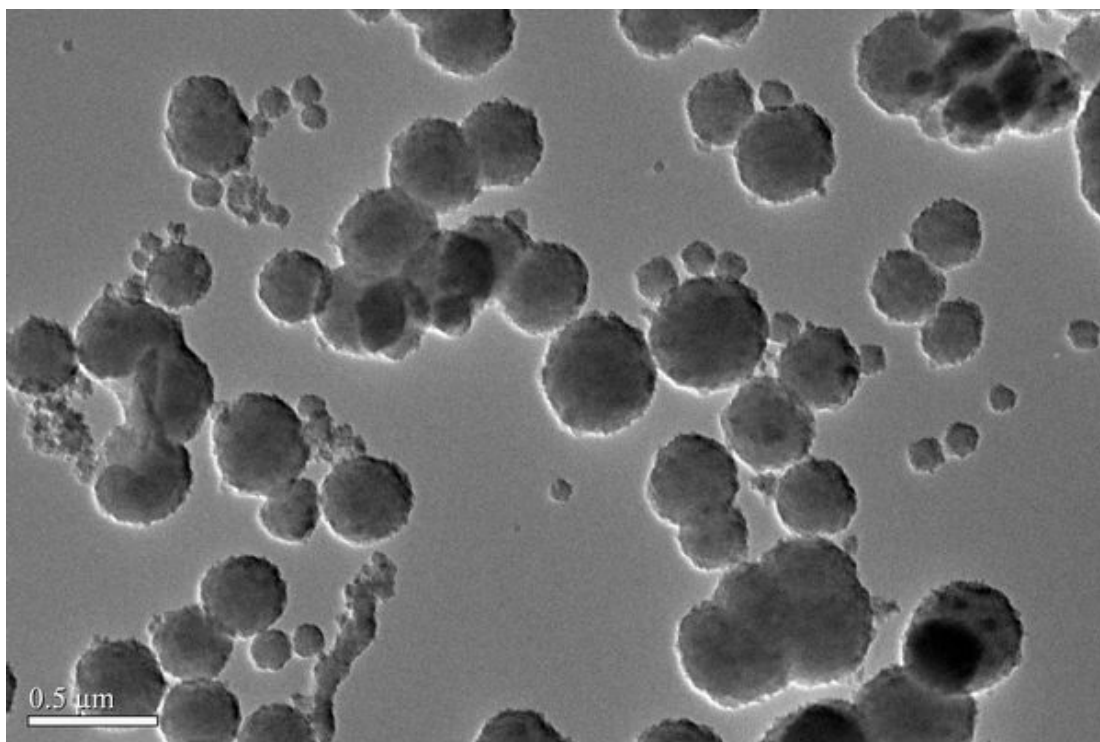

**Figure S2.** TEM image of aniline oligomers obtained in the absence of *p*-phenylenediamin.

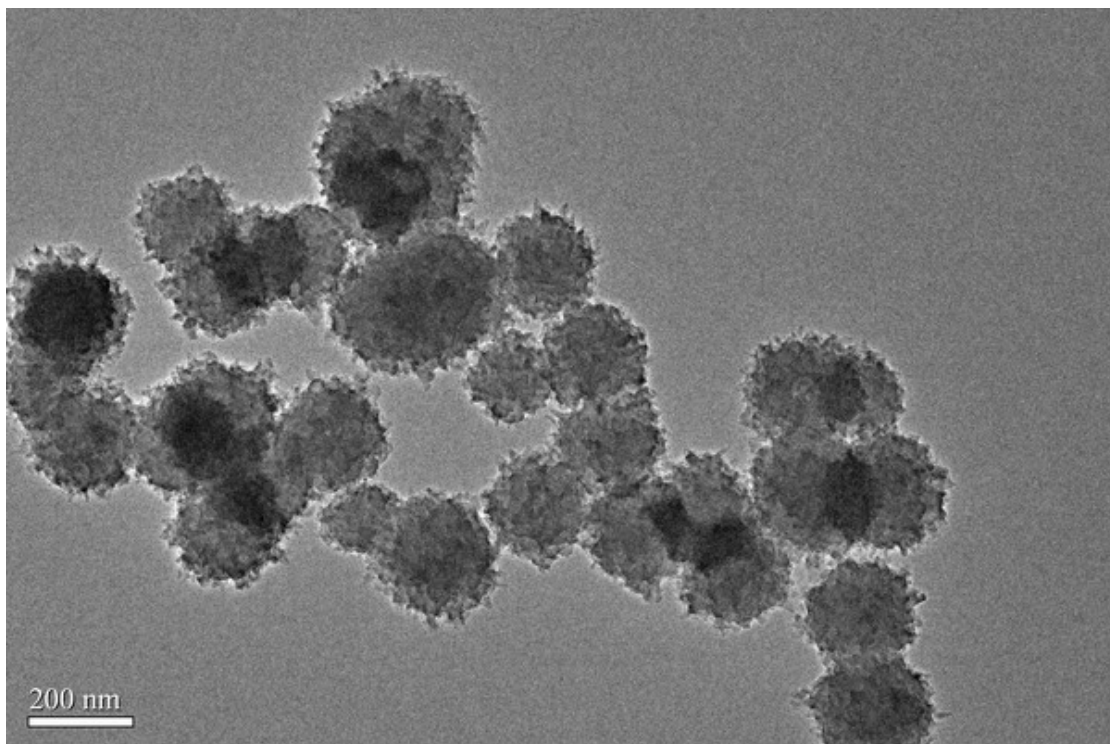

**Figure S3.** TEM image of aniline oligomers obtained at 60 °C.

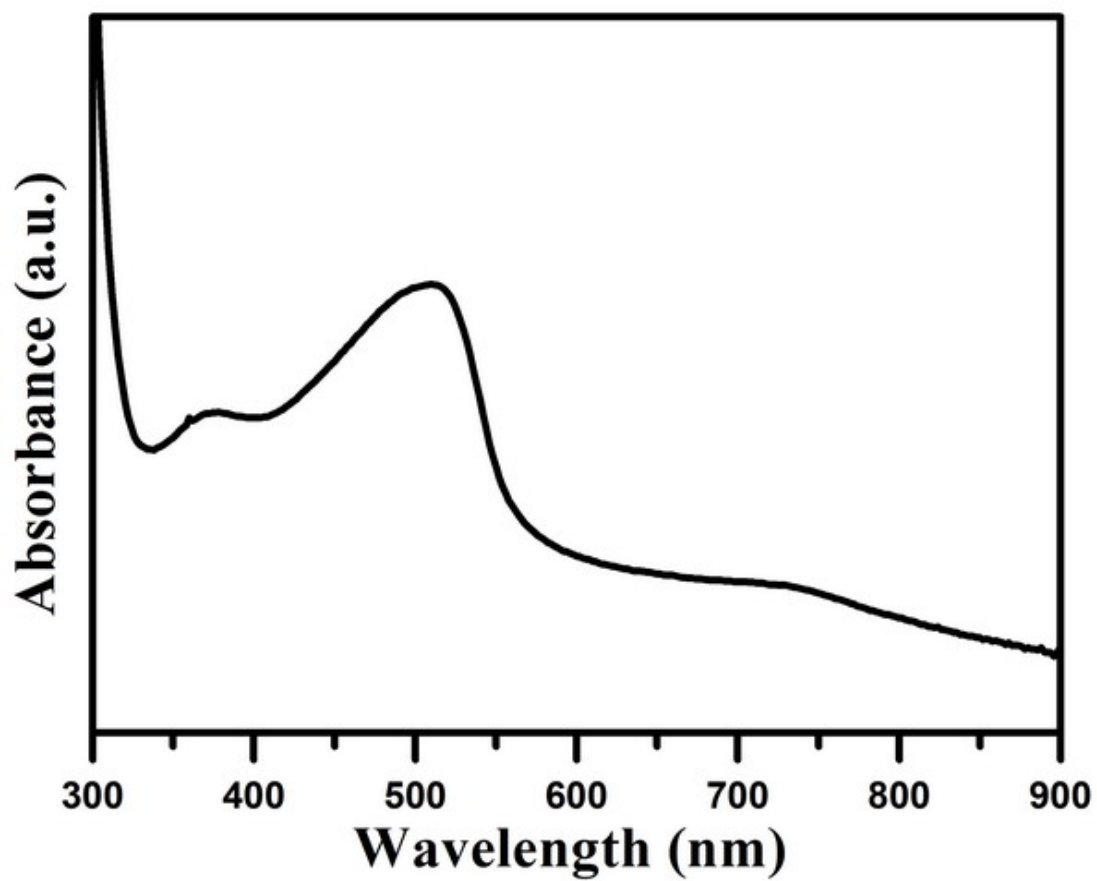

**Figure S4.** UV-Vis spectrum of aniline oligomers with increasing the acid amount to 30  $\mu\text{L}$ .

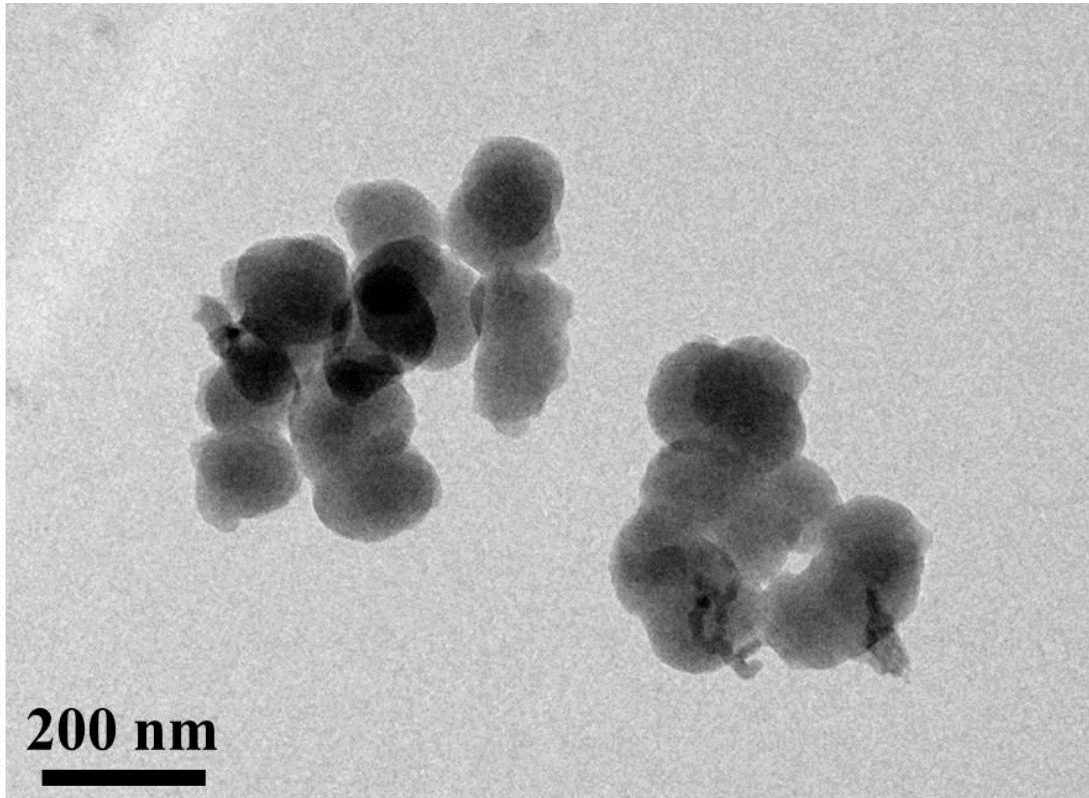

**Figure S5.** TEM image of PANI spheres by using PVP as surfactant

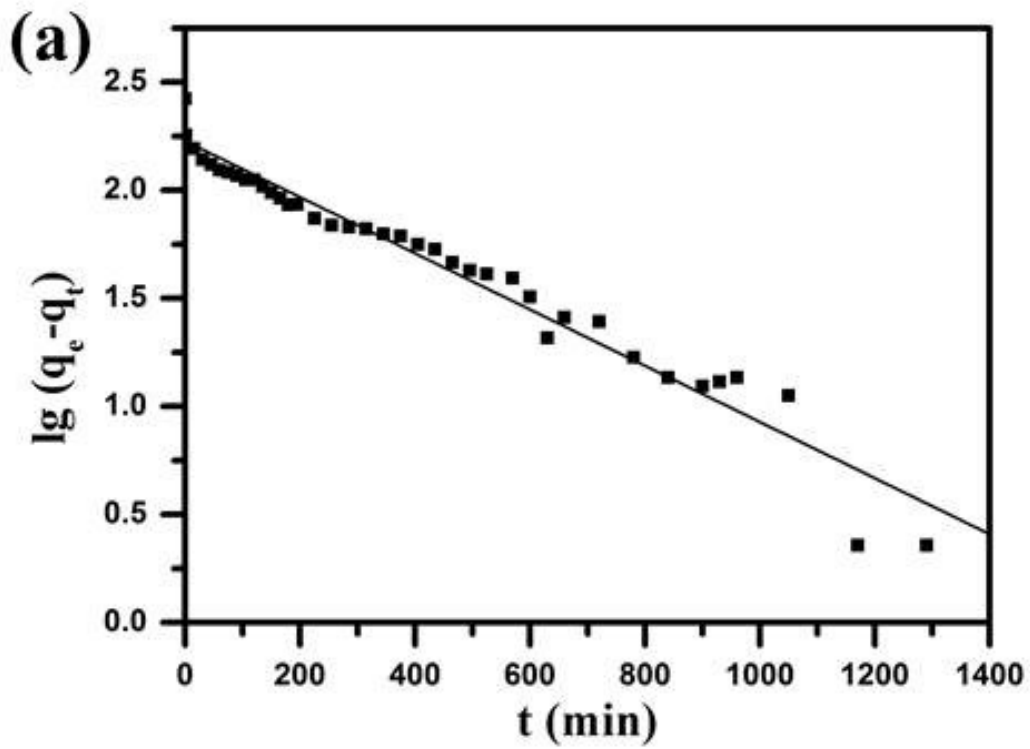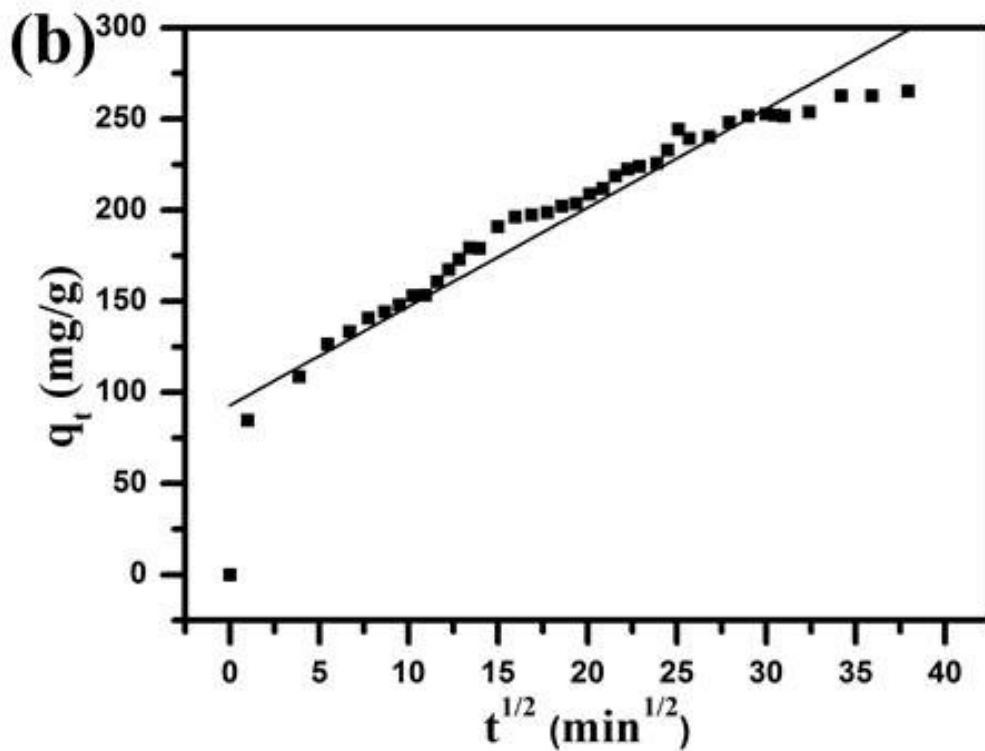

**Figure S6.** Pseudo-first-order (a) and intraparticle diffusion models (b) kinetic plots for the adsorption of coomassie brilliant blue G250 by raspberry-like aniline oligomers.

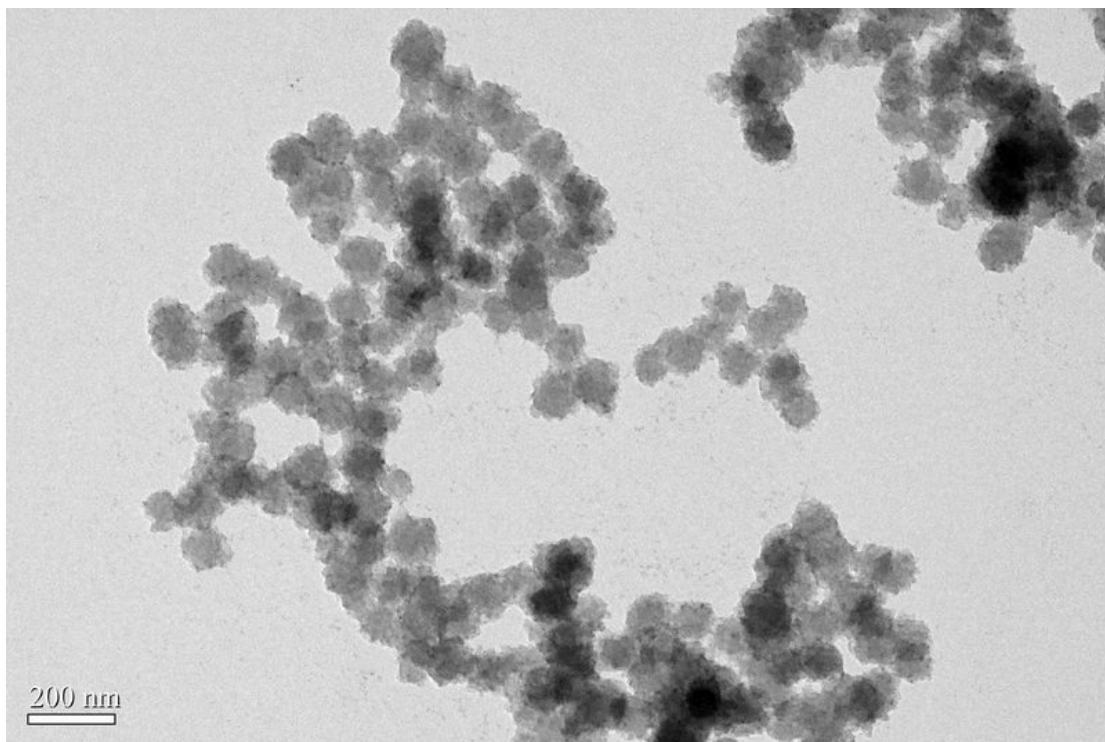

**Figure S7.** TEM image of the raspberry-like aniline oligomers incubating in ethanol for 10 hrs.
